# Supplementary material for: Comparative Study of Green Sub- and Supercritical Processes to Obtain Carnosic Acid and Carnosol-Enriched Rosemary Extracts with in Vitro Anti-Proliferative Activity on Colon Cancer Cells
Source: MDPI journal article supplement (doi:10.3390/ijms17122046), 2016-12-07
Supplement: s1 [file s1]

# Supplementary Materials: Comparative Study of Green Sub- and Supercritical Processes to Obtain Carnosic Acid and Carnosol-Enriched Rosemary Extracts with In Vitro Anti-Proliferative Activity on Colon Cancer Cells

Andrea del Pilar Sánchez-Camargo, Virginia García-Cañas, Miguel Herrero, Alejandro Cifuentes and Elena Ibáñez

**Table S1.** Quantification of main phenolic and volatiles compounds in the rosemary extracts. Carnosic acid (CA), Carnosol (CS). Concentrations indicated as mg/g extract  $\pm$  SD. Values are the mean of three replicates.

| Sample | mg/g Extract                    |                               |                                 |                               |                               |
|--------|---------------------------------|-------------------------------|---------------------------------|-------------------------------|-------------------------------|
|        | CA                              | CS                            | CA + CS                         | 1.8-Cineole                   | Camphor                       |
| PLE    | 104.96 $\pm$ 1.87 <sup>c</sup>  | 10.66 $\pm$ 0.06 <sup>c</sup> | 115.63 $\pm$ 1.93 <sup>c</sup>  | 6.78 $\pm$ 0.14 <sup>c</sup>  | 8.57 $\pm$ 0.43 <sup>c</sup>  |
| SFE1   | 355.73 $\pm$ 17.44 <sup>a</sup> | 39.23 $\pm$ 1.91 <sup>a</sup> | 394.97 $\pm$ 17.91 <sup>a</sup> | 46.42 $\pm$ 1.95 <sup>a</sup> | 31.97 $\pm$ 1.90 <sup>a</sup> |
| SFE2   | 443.28 $\pm$ 4.09 <sup>b</sup>  | 88.88 $\pm$ 5.41 <sup>b</sup> | 532.16 $\pm$ 4.73 <sup>b</sup>  | 34.88 $\pm$ 1.30 <sup>b</sup> | 20.23 $\pm$ 0.82 <sup>b</sup> |
| SAF1   | 386.49 $\pm$ 1.98 <sup>d</sup>  | 64.24 $\pm$ 4.04 <sup>d</sup> | 450.73 $\pm$ 4.70 <sup>d</sup>  | 18.11 $\pm$ 0.33 <sup>d</sup> | 50.02 $\pm$ 2.62 <sup>d</sup> |
| SAF2   | 354.92 $\pm$ 7.63 <sup>a</sup>  | 44.04 $\pm$ 0.73 <sup>a</sup> | 398.96 $\pm$ 8.00 <sup>a</sup>  | 36.79 $\pm$ 1.76 <sup>b</sup> | 50.34 $\pm$ 2.93 <sup>d</sup> |
| SAF3   | 263.70 $\pm$ 8.07 <sup>e</sup>  | 33.89 $\pm$ 0.51 <sup>e</sup> | 297.59 $\pm$ 8.57 <sup>e</sup>  | 22.38 $\pm$ 0.89 <sup>e</sup> | 31.38 $\pm$ 1.29 <sup>a</sup> |

PLE, Pressurized liquid extraction; SFE, Supercritical fluid extraction; SAF, Supercritical antisolvent fractionation. In each column, superscripts mean groups not statistically different ( $p > 0.05$ ), as analyzed by one-way ANOVA.

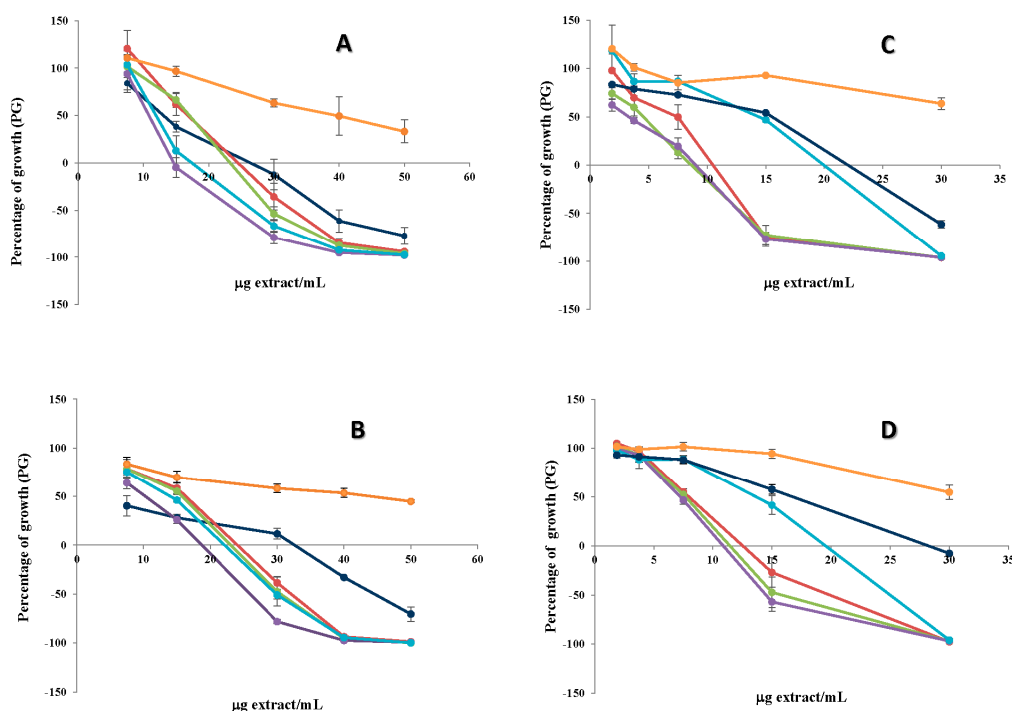

**Figure S1.** Percentage of growth (PG) of HT-29 and HCT116 colon cancer cells exposed to the different extracts concentrations at different exposure times. Calculated values for HT-29 at 24 h (A) and 72 h (B); and for HCT116 at 24 h (C) and 72 h (D). SFE1 (blue line), SFE2 (cyan line), PLE (orange line), SAF1 (red line), SAF2 (green line), SAF3 (violet line). Error bars represent standard error of the mean (SEM).

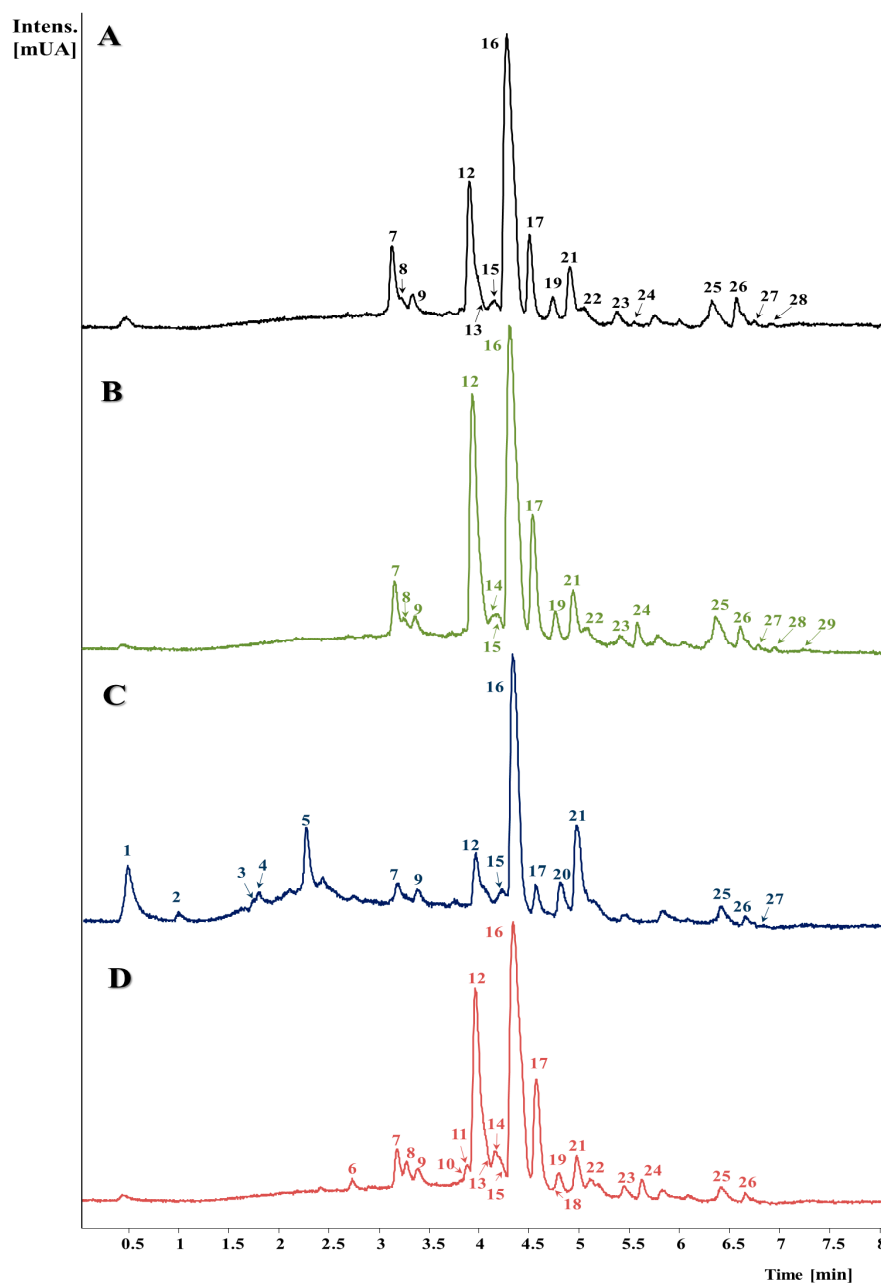

**Figure S2.** Chromatograms (at 280 nm) corresponding to SFE1 (A); SFE2 (B); PLE (C) and SAF1 (D) extracts. SAF1 was selected as example for PLE + SAF integrated process. For peak identification, see Table 3.
